# Supplementary material for: Folic Acid and Vitamin B12 Prevent Deleterious Effects of Rotenone on Object Novelty Recognition Memory and Kynu Expression in an Animal Model of Parkinson’s Disease
Source: MDPI journal article supplement (doi:10.3390/genes13122397), 2022-12-17
Supplement: s1 [file s1]

# Folic Acid and Vitamin B12 Prevent Deleterious Effects of Rotenone on Object Novelty Recognition Memory and *Kynu* Expression in an Animal Model of Parkinson's Disease.

Gabriela Canalli Kretzschmar <sup>1,†</sup>, Adriano D. S. Targa <sup>2,†</sup>, Sheila Coelho Soares-Lima <sup>3</sup>, Priscila I. dos Santos <sup>1</sup>, Lais S. Rodrigues <sup>2</sup>, Daniel A. Macedo <sup>2</sup>, Luis Felipe Ribeiro Pinto <sup>3</sup>, Marcelo M. S. Lima <sup>2</sup> and Angelica Beate Winter Boldt <sup>1,\*</sup>

<sup>1</sup> Laboratory of Human Molecular Genetics, Postgraduate Program in Genetics, Department of Genetics, Federal University of Paraná (UFPR), Centro Politécnico, Jardim das Américas, Curitiba 81531-990, PR, Brazil

<sup>2</sup> Laboratory of Neurophysiology, Department of Physiology, Federal University of Paraná (UFPR), Centro Politécnico, Jardim das Américas, Curitiba 81531-990, PR, Brazil

<sup>3</sup> Molecular Carcinogenesis Program, National Cancer Institute, Research Coordination, Rio de Janeiro 20231-050, RJ, Brazil

\* Correspondence: angelicaboldt@gmail.com; Tel.: +55-(41)-3361-1553

† These authors contributed equally to this work.

**Supplementary Table S1—Primers for *Kynu* Pyrosequencing.**

| Primer                                                                                                                                                                                                                                                                                                                                                                        | 5'- 3' Sequence                | Nt | Tm °C | %GC  |
|-------------------------------------------------------------------------------------------------------------------------------------------------------------------------------------------------------------------------------------------------------------------------------------------------------------------------------------------------------------------------------|--------------------------------|----|-------|------|
| Forward                                                                                                                                                                                                                                                                                                                                                                       | AAGAGTTGGAAGAGGTTGTTAGT        | 23 | 60.8  | 39.1 |
| Reverse -biotinylated                                                                                                                                                                                                                                                                                                                                                         | CTCCACCCTATAAAAAATTTACATATCAAC | 30 | 59.1  | 30   |
| Sequencing                                                                                                                                                                                                                                                                                                                                                                    | GGTTGTTAGTAGAGTTAGAT           | 20 | 45.4  | 35   |
| <b>Sequence with marked primers</b>                                                                                                                                                                                                                                                                                                                                           |                                |    |       |      |
| AAGAGTTGGA AGAGGTTGTT AGT<br>               <br>GGTTGTT AGTAGAGTTA GAT<br>               <br>271 AAGAGTTGGA AGAGGTTGTT AGTAGAGTTA GATGTTTGGT AAGTTGGGGT GGGGATGGGG GAGGTGT <sup>Y</sup> GT ATTTTGTTTA GTTTTGTG<br>cg1<br>361 GTGGTTAGAA ATTTGTAATT <sup>Y</sup> GATTTAATT GGGTGGGAGG AATTAAAGTT GATATGTAAA TTTTATATAG GGTGGAG 438<br>cg2<br>CAA CTATACATTT AAAAAATATC CCACCTC |                                |    |       |      |

The primers were designed using the PyroMark Assay Design 2.0 (Qiagen), considering the promotor sequence of the *Kynu* gene in the RGSC 6.0/rn6 rat genome. The software provides a reliability score for the generated primers, and the highest option was chosen (93%). The analyzed CpG sites are represented in red. The *cg2* site is orthologous to *cg15836722* in the *KYNU* human promoter and is the closest CpG to the transcription start site.

### Supplementary Table S2—Pyrosequencing PCR Protocol.

| Reagents                             | [Initial] | [Final] |
|--------------------------------------|-----------|---------|
| RNase-Free Water                     | 0         | 0       |
| PyroMark PCR Master Mix, 2x          | 2         | 1       |
| CoralLoad Buffer, 10x                | 10        | 1       |
| MgCl <sub>2</sub> (mM)               | 25        | 2       |
| Primer set (nmol)                    | 2.54      | 0.2     |
| DNA converted with bisulfite (ng/uL) | 20        |         |
| <b>Total</b>                         |           |         |
| <b>Expected products</b>             |           |         |
| <i>Kynu</i>                          | 167 bp    |         |

We used the PyroMark PCR kit (Qiagen) and evaluated the quality of PCR amplification in 1.5% agarose gel electrophoresis.

### Supplementary Table S3—Primers for *Kynu* Expression Analysis.

| Gene           | Primer | 5'-3'Sequence            | Nt | Tm°C  | %CG   | bp  |
|----------------|--------|--------------------------|----|-------|-------|-----|
| <i>Kynu</i>    | F      | TCTGTGACAAGCGAGAACCA     | 20 | 59.25 | 50    | 113 |
|                | R      | TGTAGAGTCGAGTATGGCAGTAAG | 24 | 59.42 | 45.83 |     |
| <i>Actb</i> *  | F      | TGTCACCAACTGGGACGATA     | 20 | 58.37 | 50    | 166 |
|                | R      | GGGGTGTGAAAGGTCTCAAA     | 21 | 58.34 | 47.62 |     |
| <i>Hprt1</i> * | F      | GCAGACTTTGCTTTCCTTGG     | 20 | 57.57 | 50    | 81  |
|                | R      | CGAGAGGTCCTTTTCACCAG     | 20 | 57.91 | 55    |     |

\* Primer sequences already described by Elfving et al., (2019).

### Supplementary Table S4—qPCR Protocol.

| Reagents              | [Initial] | [Final] |
|-----------------------|-----------|---------|
| Rnase-Free Water      | 0         | 0       |
| GO Taq Master Mix, 2x | 2         | 1       |
| Primer Forward (uM)   | 10        | 10      |
| Primer Reverse (uM)   | 10        | 10      |
| cDNA (ng/uL)          | 12.5      | 12.5    |

**Supplementary Figure S1—*Kynu* Methylation Levels of *cg1* and *cg2*.**

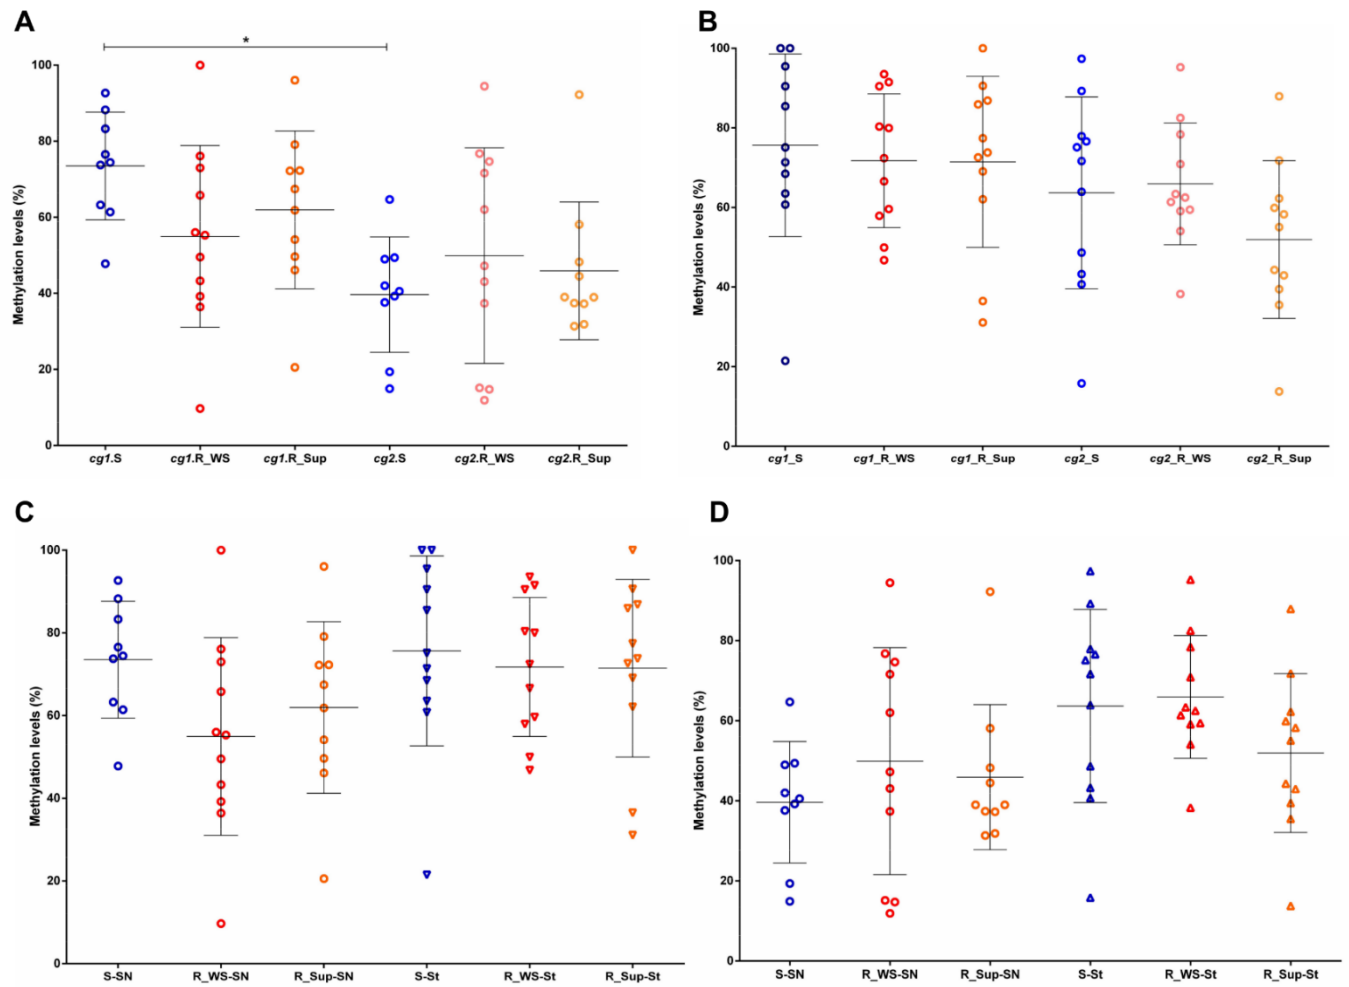

**Figure S1.** Methylation levels of *cg1* and *cg2* in the analyzed groups in (A) substantia nigra and (B) striatum; dark color = *cg1*; light color = *cg2*; (C) Methylation levels for *cg1* between analyzed groups and different brain regions; (D) Methylation levels for *cg2* between studied groups and different brain regions; S = sham; R\_WS = rotenone without supplementation; R\_Sup = rotenone supplemented. In B and C, the circles represent substantia nigra, and the triangles represent the striatum region. No significant differences were found between the groups in B, C, and D. \*  $p < .01$ . Data are the mean with SD.

**Supplementary Figure S2—Differences in Methylation Levels Between the Substantia Nigra and the Striatum.**

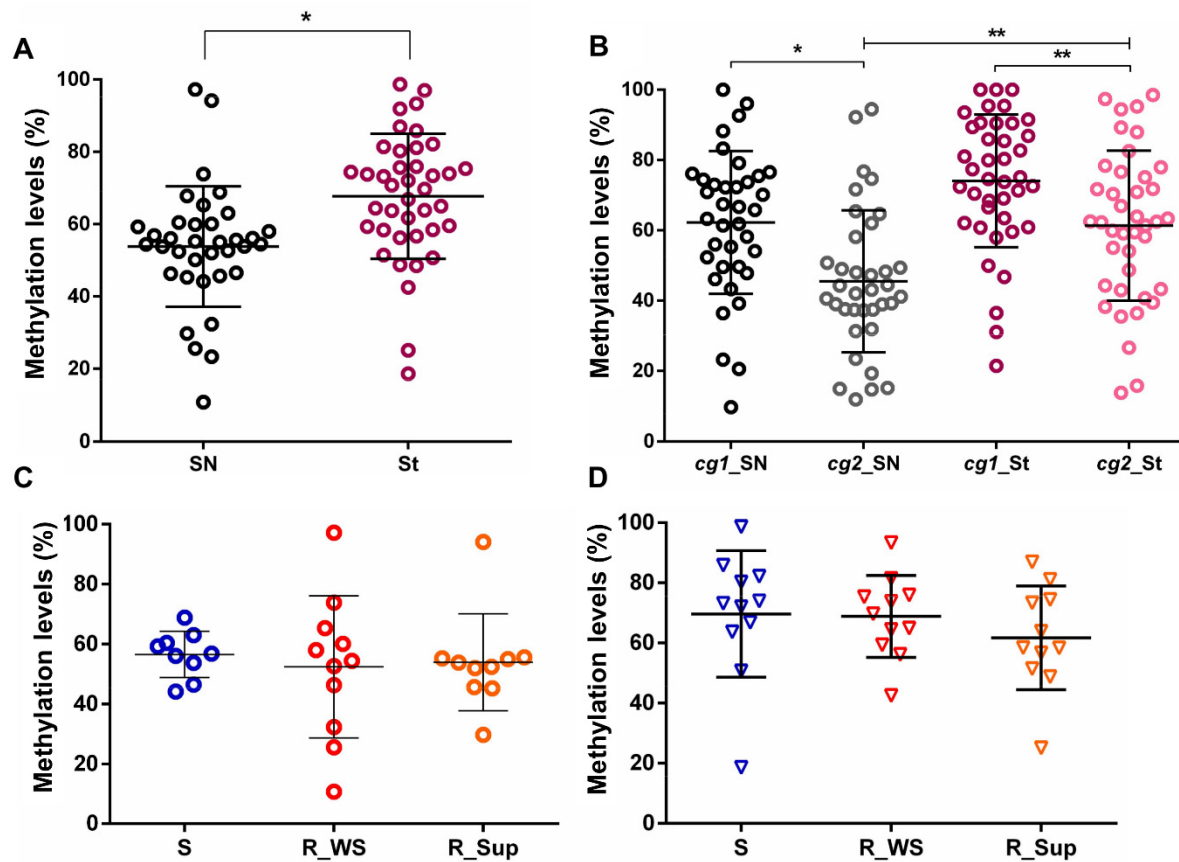

**Figure S2.** (A) Methylation mean (*cg1* and *cg2*) between the substantia nigra (SN) and the striatum (St). The methylation levels are higher in St (mean =  $67.69 \pm 17.31$ ,  $n = 40$ ) than SN (mean =  $53.81 \pm 16.66$ ,  $n = 36$ ). (B) Differences in methylation levels of two CpG sites analyzed between SN and St. *cg1* (SN: mean =  $62.23 \pm 20.34$ ,  $n = 37$ ; St: mean =  $74.05 \pm 18.86$ ,  $n = 40$ ) showed a higher methylation level than *cg2* (SN: mean =  $45.51 \pm 20.21$ ,  $n = 36$ ; St: mean =  $61.32 \pm 21.35$ ,  $n = 40$ ) in both brain regions. (C) Methylation mean (*cg1* and *cg2*) between the groups in SN. S = sham (mean =  $56.58$ ,  $68.84 \pm 44.20$ ,  $n = 9$ ); R\_WS = rotenone without supplementation (mean =  $52.44$ ,  $97.24 \pm 10.82$ ,  $n = 11$ ); R\_Sup = rotenone supplemented (mean =  $53.93$ ,  $94.16 \pm 29.79$ ,  $n = 10$ ). (D) Methylation mean (*cg1* and *cg2*) between the groups in St. S: mean =  $69.67$ ,  $98.68 \pm 18.66$ ,  $n = 11$ ; R\_WS: mean =  $68.84$ ,  $93.38 \pm 42.54$ ,  $n = 11$ ; R\_Sup: mean =  $61.70$ ,  $86.94 \pm 25.14$ ,  $n = 11$ . \*  $p < 0.01$ ; \*\*  $p < 0.05$ . Data are the mean with SD.

**Supplementary Figure S3—Correlation Between *Kynu* Gene Expression and Methylation Levels.**

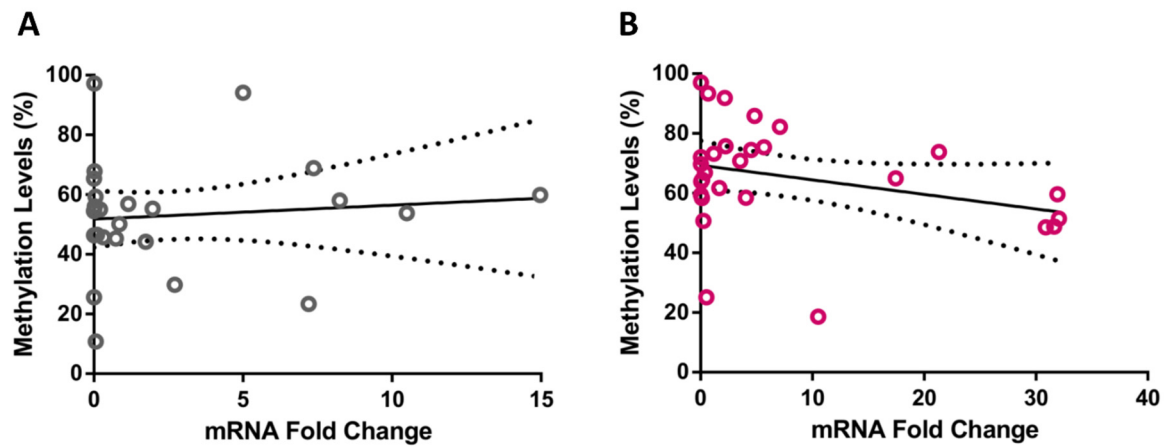

**Figure S3.** Absence of correlation between the expression of the *Kynu* gene and the CpG sites analyzed in (A) the substantia nigra ( $r = .09$ ,  $p > .5$ ,  $n = 25$ ) and (B) the striatum ( $r = -0.31$ ,  $p > .1$ ,  $n = 28$ ).

**Supplementary Figure S4—*Kynu* Expression in the Substantia Nigra and the Striatum.**

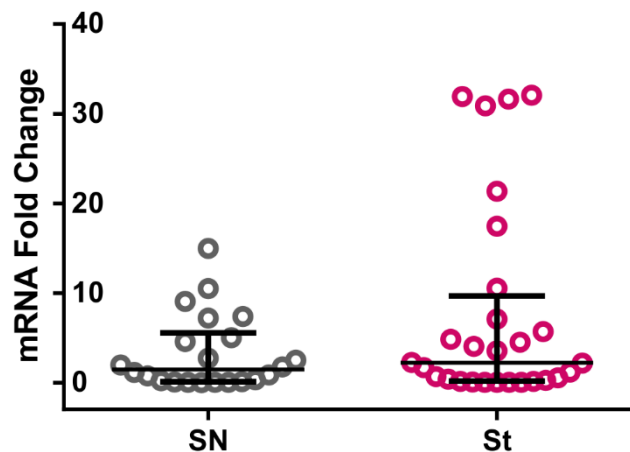

**Figure S4.** There were no significant changes in *Kynu* expression between the substantia nigra (median: 1.14, min: 0.004, max: 14.97,  $n = 22$ ) and striatum (median: 2.21, min: 0.02, max: 32.06,  $n = 28$ ). Data are the median with interquartile range. Min = minimum; Max = maximum.
